# Supplementary material
Source: PubMed Central journal article supplement (PMC3219424)
Supplement: 11-7880_z7g999112067sf01.pdf [file 11-7880_z7g999112067sf01.pdf]

**Supplemental Figure S2: Conjunctivalisation: anterioplacement of the muco-cutaneous junction of the upper eyelid**

| Sign | Definition                                                                                                                                                                               |                                                                                      |
|------|------------------------------------------------------------------------------------------------------------------------------------------------------------------------------------------|--------------------------------------------------------------------------------------|
| 0    | None. The muco-cutaneous junction is posterior to the line of meibomian gland orifices, which clearly lie within the lid margin skin.                                                    | 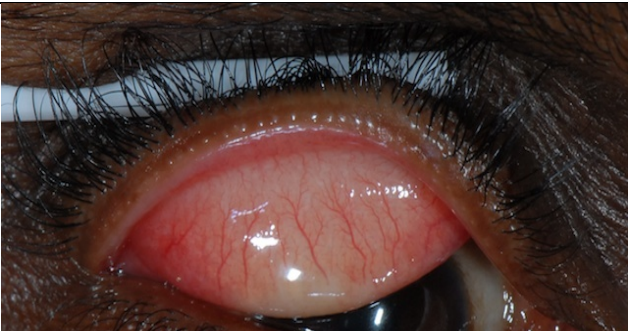   |
| 1    | Muco-cutaneous junction is located anterior to its normal position; the junction is very close to meibomian gland orifices, which lie just within lid margin skin.                       |    |
| 2    | The muco-cutaneous junction is located anterior to the line of the meibomian gland orifices for <50% lid (in this picture temporal orifices are enveloped in conjunctival epithelium)    |   |
| 3    | The muco-cutaneous junction is located anterior to the line of the meibomian gland orifices for >50% lid (in this picture all central orifices are enveloped in conjunctival epithelium) |  |
