# Supplementary material
Source: PubMed Central journal article supplement (PMC3219424)
Supplement: 11-7880_z7g999112067st1.pdf [file 11-7880_z7g999112067st1.pdf]

**Supplementary Table S1: Entropion grading system (assessed with eye in primary position).**

| <b>Grade</b> |            | <b>Definition</b>                                                     |
|--------------|------------|-----------------------------------------------------------------------|
| E0           | (none)     | None                                                                  |
| E1           | (mild)     | <50 % of lid margin rolled inwards without cornea - lash base contact |
| E2           | (moderate) | >50% of lid margin rolled inwards without cornea –lash base contact   |
| E3           | (severe)   | Lid margin rolled inwards with <50% lash base – cornea contact        |
| E4           | (severe)   | Lid margin rolled inwards with >50% lash base – cornea contact        |
